# Supplementary material for: Unexpected structural preference with metallophilic Ag–Au contacts in silver(i)-N-heterocyclic carbene cluster; experimental and theoretical approach
Source: Royal Society of Chemistry journal article supplement (doi:10.1039/d3dt02551a), 2023-12-15
Supplement: d3dt02551a1.pdf [file d3dt02551a1.pdf]

## Unexpected structural preference with metallophilic Ag--- Au contacts in silver(I)-N heterocyclic carbene cluster; experimental and theoretical approach

Priyanka Sahu,<sup>a</sup> Narayan C Jana,<sup>b</sup> Sahadev Barik,<sup>b</sup> Hemanta K. Kisan,<sup>c</sup>  
Avtar Changotra,<sup>d</sup> Anvarhusein A. Isab,<sup>e</sup> Joydev Dinda<sup>\*a</sup>

<sup>a</sup>Department of Chemistry, Utkal University, Bhubaneswar-751004, Odisha, India.

<sup>b</sup>School of Chemical Sciences, National Institute of Science Education and Research, HBNI, Bhubaneswar, Odisha, 751004, India.

<sup>c</sup>Department of Chemistry, Indian Institute of Technology Bhilai, GEC Campus, Sejbahar, Raipur-492015, Chhattisgarh, India.

<sup>d</sup>School of Science, Department of Chemistry, Cluster University of Jammu, Jammu-180001, India.

<sup>e</sup>Department of Chemistry, King Fahd University of Petroleum and Minerals, Dhahran-31261, Saudi Arabia

### Electronic Supplementary Information (ESI)

#### Table of contents:

|                                                                                                                                                                                                                                                                                                               |     |
|---------------------------------------------------------------------------------------------------------------------------------------------------------------------------------------------------------------------------------------------------------------------------------------------------------------|-----|
| Table S1: Summary of key crystallographic data of <b>2</b> & <b>3</b> .                                                                                                                                                                                                                                       | 3   |
| Table S2: Summary of selected bond distances (Å).                                                                                                                                                                                                                                                             | 4   |
| Table S3: Summary of selected bond angles (°).                                                                                                                                                                                                                                                                | 4-5 |
| Table S4: Vertical electronic transition as computed at TD-DFT SMD <sub>(acetonitrile)</sub> B3LYP-D3/def2-TZVP (Ag), 6-31G** (C, H, N) level of theory for complex <b>2</b> .                                                                                                                                | 6   |
| Table S5: Vertical electronic transition as computed at TD-DFT SMD <sub>(acetonitrile)</sub> B3LYP-D3/def2-TZVP (Ag, Au), 6-31G** (C, H, N, Cl) level of theory for complex <b>3</b> .                                                                                                                        | 6   |
| Table S6: Estimated strengths in complex <b>2</b> and complex <b>3</b> through the bond critical point ( $\rho$ ) in a.u. The topological parameters are derived from Atoms-in-Molecules (AIM) analysis on optimized geometry computed at the B3LYP-D3/def2-TZVP (Ag, Au), 6-31G** (C, H, N) level of theory. | 7-8 |
| Fig. S1: <sup>1</sup> H NMR spectra of <b>1</b> .HPF <sub>6</sub> .                                                                                                                                                                                                                                           | 9   |
| Fig. S2: <sup>13</sup> C NMR spectra of <b>1</b> .HPF <sub>6</sub> .                                                                                                                                                                                                                                          | 9   |
| Fig. S3: <sup>1</sup> H NMR spectra of complex <b>2</b> .                                                                                                                                                                                                                                                     | 10  |
| Fig. S4: <sup>13</sup> C NMR spectra of complex <b>2</b> .                                                                                                                                                                                                                                                    | 10  |
| Fig. S5: <sup>1</sup> H NMR spectra of complex <b>3</b> .                                                                                                                                                                                                                                                     | 11  |
| Fig. S6: <sup>13</sup> C NMR spectra of complex <b>3</b> .                                                                                                                                                                                                                                                    | 11  |
| Fig. S7: HR-MS spectra of complex <b>2</b> .                                                                                                                                                                                                                                                                  | 12  |
| Fig. S8: HR-MS spectra of complex <b>3</b> .                                                                                                                                                                                                                                                                  | 12  |

|                                                                                                                                                                 |    |
|-----------------------------------------------------------------------------------------------------------------------------------------------------------------|----|
| Figure S9:Mass spectrometry: experimental data (top) and isotopic pattern simulations (bottom) of complex <b>3</b> .                                            | 13 |
| Fig. S10: UV-Vis spectra of <b>1</b> .HPF <sub>6</sub> , complex <b>2</b> , and complex <b>3</b> at 0.05 mM at room temperature.                                | 14 |
| Fig. S11:Molecular orbitals obtained for <b>2</b> at TD-DFT SMD <sub>(acetonitrile)</sub> / B3LYP-D3/def2-TZVP (Ag), 6-31G** (C, H, N) level of theory.         | 15 |
| Fig. S12:Molecular orbitals obtained for <b>3</b> at TD-DFT SMD <sub>(acetonitrile)</sub> / B3LYP-D3/def2-TZVP (Ag, Au), 6-31G** (C, H, N, Cl) level of theory. | 16 |
| References                                                                                                                                                      | 17 |

**Table S1:** Summary of key crystallographic data of **2** and **3**.

|                                 | <b>2</b>                                                                                          | <b>3</b>                                                                                                                   |
|---------------------------------|---------------------------------------------------------------------------------------------------|----------------------------------------------------------------------------------------------------------------------------|
| Empirical formula               | 'C <sub>65</sub> H <sub>62</sub> Ag <sub>3</sub> F <sub>18</sub> N <sub>19</sub> P <sub>3</sub> ' | 'C <sub>44.50</sub> H <sub>45</sub> Ag <sub>2</sub> AuClF <sub>12</sub> N <sub>13</sub> O <sub>0.50</sub> P <sub>2</sub> ' |
| Formula weight                  | 1867.85                                                                                           | 1508.03                                                                                                                    |
| Crystal system                  | 'trigonal'                                                                                        | 'monoclinic'                                                                                                               |
| Space group                     | 'P-3 c 1'                                                                                         | 'I12/m1'                                                                                                                   |
| Temperature (K)                 | 100.01(10)                                                                                        | 100.00(10)                                                                                                                 |
| Cell dimensions                 |                                                                                                   |                                                                                                                            |
| a (Å)                           | 23.0541(3)                                                                                        | 14.2719(4)                                                                                                                 |
| b (Å)                           | 23.0541(3)                                                                                        | 24.7697(6)                                                                                                                 |
| c (Å)                           | 23.7591(4)                                                                                        | 14.7213(4)                                                                                                                 |
| α(°)                            | 90                                                                                                | 90                                                                                                                         |
| β(°)                            | 90                                                                                                | 96.862(3)                                                                                                                  |
| γ(°)                            | 120                                                                                               | 90                                                                                                                         |
| Volume(Å <sup>3</sup> )         | 10936.0(3)                                                                                        | 5166.9(2)                                                                                                                  |
| Z                               | 6                                                                                                 | 4                                                                                                                          |
| Density (Mg m <sup>-3</sup> )   | 1.702                                                                                             | 1.939                                                                                                                      |
| Absorption coefficient          | 0.965                                                                                             | 3.789                                                                                                                      |
| F(000)                          | 5598                                                                                              | 2940                                                                                                                       |
| Theta range for data collection | 1.9630-30.6820                                                                                    | 3.7680-30.6130                                                                                                             |
| Index ranges                    | -29<=h<=28,-31<=k<=32,-28<=l<= 30                                                                 | -17<=h<=18,-32<=k<=32,-19<=l<= 18                                                                                          |
| Reflections collected           | 8104                                                                                              | 5596                                                                                                                       |
| Independent reflections         | 9586                                                                                              | 6503                                                                                                                       |
| GOF                             | 1.023                                                                                             | 1.050                                                                                                                      |
| Final R indices [I>2σ(I)]       | R1=0.0324, wR2=0.0760                                                                             | R1=0.0427, wR2=0.0927                                                                                                      |
| R indices (all data)            | R1=0.0413, wR2=0.0813                                                                             | R1=0.0529, wR2=0.0959                                                                                                      |

**Table S2:**Summary of selected bond distances (Å) of **2** and **3**. The theoretical values are obtained at B3LYP-D3/def2-TZVP (Ag, Au), 6-31G\*\* (C, H, N, Cl) level of theory.<sup>1,2,3</sup>

|                    | <b>2</b>     |             |             | <b>3</b>     |             |
|--------------------|--------------|-------------|-------------|--------------|-------------|
|                    | Experimental | Theoretical |             | Experimental | Theoretical |
| <b>Ag(1)-Ag(1)</b> | 2.7725(3)    | 2.8856      | Au(1)-Ag(1) | 3.1006(4)    | 3.5003      |
| <b>Ag(2)-Ag(2)</b> | 2.7539(3)    | 2.8848      | Ag(1)-Cl(1) | 2.5476(10)   | 2.6340      |
| <b>Ag(1)-C(12)</b> | 2.257(2)     | 2.3137      | Au(1)-C(10) | 2.036(5)     | 2.0582      |
| <b>Ag(1)-N(1)</b>  | 2.3281(18)   | 2.3769      | Ag(1)-N(1)  | 2.240(4)     | 2.2969      |
| <b>Ag(1)-N(5)</b>  | 2.3294(18)   | 2.3769      | Ag(1)-N(5)  | 2.229(4)     | 2.2767      |

**Table S3:**Summary of selected bond angles (°)of **2** and **3**.The theoretical values are obtained at B3LYP-D3/def2-TZVP (Ag, Au), 6-31G\*\* (C, H, N, Cl) level of theory.

|                       | <b>2</b>     |             |                       | <b>3</b>     |             |
|-----------------------|--------------|-------------|-----------------------|--------------|-------------|
|                       | Experimental | Theoretical |                       | Experimental | Theoretical |
| Ag(1)-Ag(1)-<br>Ag(1) | 60.0         | 60.01       | Ag(1)-Au(1)-<br>Ag(1) | 66.136(13)   | 60.33       |
| Ag(1)-C(12)-<br>Ag(1) | 52.01(5)     | 51.34       | Ag(1)-Cl(1)-<br>Ag(1) | 83.22(4)     | 83.79       |
| Ag(1)-C(12)-<br>Ag(1) | 52.53(5)     | 51.45       | Cl(1)-Ag(1)-<br>Au(1) | 105.32(2)    | 176.57      |
| C(12)-Ag(1)-<br>Ag(1) | 112.48(5)    | 111.50      | Ag(1)-Au(1)-<br>C(10) | 60.46(11)    | 59.20       |
| C(12)-Ag(1)-<br>Ag(1) | 111.96(5)    | 111.29      | Ag(1)-Au(1)-<br>C(10) | 126.58(11)   | 117.42      |
| C(12)-Ag(1)-<br>C(12) | 163.84(7)    | 162.94      | C(10)-Au(1)-<br>C(10) | 173.0(2)     | 176.57      |
| N(1)-Ag(1)-<br>Ag(1)  | 117.22(5)    | 113.10      | N(1)-Ag(1)-<br>Au(1)  | 98.50(9)     | 71.72       |
| N(1)-Ag(1)-<br>Ag(1)  | 125.21(5)    | 123.37      | N(1)-Ag(1)-<br>Cl(1)  | 110.02(9)    | 112.11      |
| C(12)-Ag(1)-<br>N(1)  | 99.80(7)     | 103.78      | N(1)-Ag(1)-<br>N(5)   | 126.64(14)   | 152.92      |
| C(12)-Ag(1)-<br>N(1)  | 85.92(7)     | 85.72       | N(5)-Ag(1)-<br>Au(1)  | 101.68(9)    | 97.77       |

|                      |            |        |                      |           |        |
|----------------------|------------|--------|----------------------|-----------|--------|
| N(1)-Ag(1)-<br>N(5)  | 105.76(7)  | 114.09 | N(5)-Ag(1)-<br>Cl(1) | 111.24(9) | 94.79  |
| N(4)-C(12)-<br>N(3)  | 103.45(18) | 103.63 | N(4)-C(10)-<br>N(3)  | 104.7(4)  | 104.39 |
| N(5)-Ag(1)-<br>Ag(1) | 115.22(5)  | 113.13 |                      |           |        |
| N(5)-Ag(1)-<br>Ag(1) | 128.70(5)  | 123.36 |                      |           |        |
| C(12)-Ag(1)-<br>N(5) | 107.86(7)  | 103.64 |                      |           |        |
| C(12)-Ag(1)-<br>N(5) | 85.27(7)   | 85.73  |                      |           |        |

**Table S4:** Vertical electronic transition as computed at TD-DFT SMD<sub>(acetonitrile)</sub> B3LYP-D3/def2-TZVP (Ag), 6-31G\*\* (C, H, N) level of theory for complex **2**.

| $E_e$ (eV) | $\lambda_{\text{theo}}$ (nm) | Osc. Strength ( $f$ ) | Key transitions |
|------------|------------------------------|-----------------------|-----------------|
| 4.1055     | 301.99                       | 0.1065                | HOMO→LUMO       |
| 4.1106     | 301.62                       | 0.1073                | HOMO-1→LUMO     |
| 4.1291     | 300.27                       | 0.0135                | HOMO-2→LUMO     |
| 4.3981     | 281.91                       | 0.0100                | HOMO-1→LUMO+3   |
| 4.5208     | 274.25                       | 0.0111                | HOMO→LUMO+5     |
| 4.5593     | 271.94                       | 0.0580                | HOMO→LUMO-4     |
| 4.5596     | 271.92                       | 0.0589                | HOMO-1→LUMO+4   |
| 4.7064     | 263.44                       | 0.0191                | HOMO-3→LUMO     |
| 4.7068     | 263.41                       | 0.0198                | HOMO-4→LUMO     |

**Table S5:** Vertical electronic transition as computed at TD-DFT SMD<sub>(acetonitrile)</sub> B3LYP-D3/def2-TZVP (Ag, Au), 6-31G\*\* (C, H, N, Cl) level of theory for complex **3**.

| $E_e$ (eV) | $\lambda_{\text{theo}}$ (nm) | Osc. Strength ( $f$ ) | Key transitions |
|------------|------------------------------|-----------------------|-----------------|
| 4.1471     | 298.97                       | 0.0133                | HOMO→LUMO       |
| 4.4537     | 278.39                       | 0.0102                | HOMO-2→LUMO     |
| 4.4765     | 276.96                       | 0.0181                | HOMO-5→LUMO     |
| 4.5639     | 271.66                       | 0.0366                | HOMO→LUMO+1     |
| 4.6676     | 265.63                       | 0.0206                | HOMO-12→LUMO    |
| 4.6951     | 264.07                       | 0.2297                | HOMO-11→LUMO    |
| 4.7123     | 263.11                       | 0.0181                | HOMO-1→LUMO+1   |
| 4.7411     | 261.51                       | 0.0382                | HOMO-3→LUMO+1   |
| 4.7509     | 260.97                       | 0.0331                | HOMO-10→LUMO+1  |
| 4.7770     | 259.54                       | 0.0517                | HOMO-9→LUMO+1   |
| 4.7998     | 258.31                       | 0.0384                | HOMO-8→LUMO     |
| 4.8151     | 257.49                       | 0.0174                | HOMO-7→LUMO     |

**Table S6:** Estimated strengths in complex **2** and complex **3** through the bond critical point ( $\rho$ ) in a.u. The topological parameters are derived from Atoms-in-Molecules (AIM) analysis on optimized geometry computed at the B3LYP-D3/def2-TZVP (Ag, Au), 6-31G\*\* (C, H, N) level of theory.

*Ag-Ag-Ag*

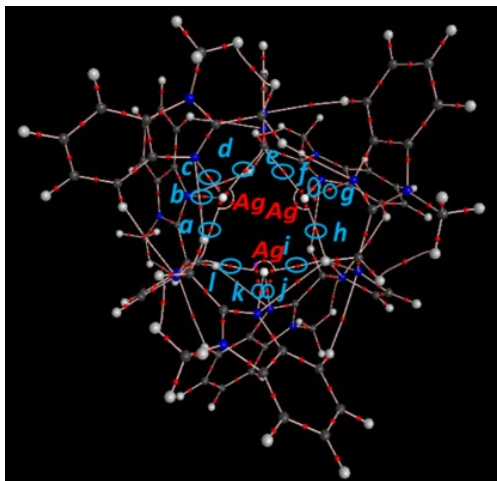

|                     | $\rho$ | $\nabla^2\rho$ | G     | $V=1/4\nabla^2\rho-2G$ | $E=1/2(V)$ | E (kcal/mol) |
|---------------------|--------|----------------|-------|------------------------|------------|--------------|
| <i>a</i>            | 0.065  | -0.044         | 0.057 | -0.125                 | -0.062     | -38.9        |
| <i>b</i>            | 0.050  | -0.053         | 0.054 | -0.121                 | -0.060     | -37.6        |
| <i>c</i>            | 0.050  | -0.053         | 0.054 | -0.121                 | -0.060     | -37.6        |
| <i>d</i>            | 0.065  | -0.044         | 0.057 | -0.125                 | -0.062     | -38.9        |
| <i>e</i>            | 0.065  | -0.044         | 0.057 | -0.125                 | -0.062     | -38.9        |
| <i>f</i>            | 0.049  | -0.052         | 0.054 | -0.121                 | -0.060     | -37.6        |
| <i>g</i>            | 0.049  | -0.053         | 0.054 | -0.121                 | -0.060     | -37.6        |
| <i>h</i>            | 0.065  | -0.045         | 0.057 | -0.125                 | -0.062     | -38.9        |
| <i>i</i>            | 0.065  | -0.044         | 0.057 | -0.125                 | -0.062     | -38.9        |
| <i>j</i>            | 0.050  | -0.053         | 0.055 | -0.123                 | -0.061     | -38.3        |
| <i>k</i>            | 0.050  | -0.053         | 0.055 | -0.123                 | -0.061     | -38.3        |
| <i>l</i>            | 0.065  | -0.044         | 0.057 | -0.125                 | -0.062     | -38.9        |
| <b>Total Energy</b> |        |                |       |                        |            | -460.4       |

*Ag-Ag-Au*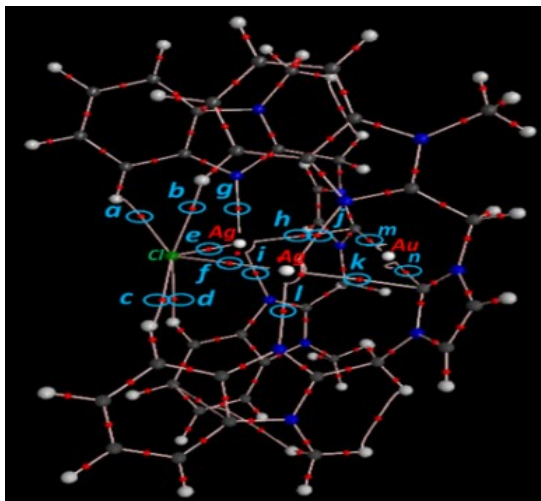

|                     | $\rho$ | $\nabla^2\rho$ | G     | $V=1/4\nabla^2\rho-2G$ | $E=1/2(V)$ | E (kcal/mol) |
|---------------------|--------|----------------|-------|------------------------|------------|--------------|
| <i>a</i>            | 0.007  | -0.006         | 0.005 | -0.011                 | -0.005     | -3.1         |
| <i>b</i>            | 0.013  | -0.010         | 0.009 | -0.020                 | -0.01      | -6.3         |
| <i>c</i>            | 0.007  | -0.006         | 0.005 | -0.011                 | -0.005     | -3.1         |
| <i>d</i>            | 0.013  | -0.010         | 0.009 | -0.020                 | -0.01      | -6.3         |
| <i>e</i>            | 0.043  | -0.036         | 0.040 | -0.089                 | -0.044     | -27.6        |
| <i>f</i>            | 0.043  | -0.036         | 0.040 | -0.089                 | -0.044     | -27.6        |
| <i>g</i>            | 0.061  | -0.067         | 0.071 | -0.159                 | -0.079     | -49.6        |
| <i>h</i>            | 0.015  | -0.011         | 0.010 | -0.023                 | -0.011     | -6.9         |
| <i>i</i>            | 0.057  | -0.064         | 0.067 | -0.15                  | -0.075     | -47.1        |
| <i>j</i>            | 0.057  | -0.064         | 0.067 | -0.15                  | -0.075     | -47.1        |
| <i>k</i>            | 0.015  | -0.011         | 0.010 | -0.023                 | -0.011     | -6.9         |
| <i>l</i>            | 0.061  | -0.067         | 0.071 | -0.159                 | -0.079     | -49.6        |
| <i>m</i>            | 0.133  | -0.054         | 0.119 | -0.251                 | -0.125     | -78.4        |
| <i>n</i>            | 0.133  | -0.054         | 0.119 | -0.251                 | -0.125     | -78.4        |
| <b>Total Energy</b> |        |                |       |                        |            | -438.0       |



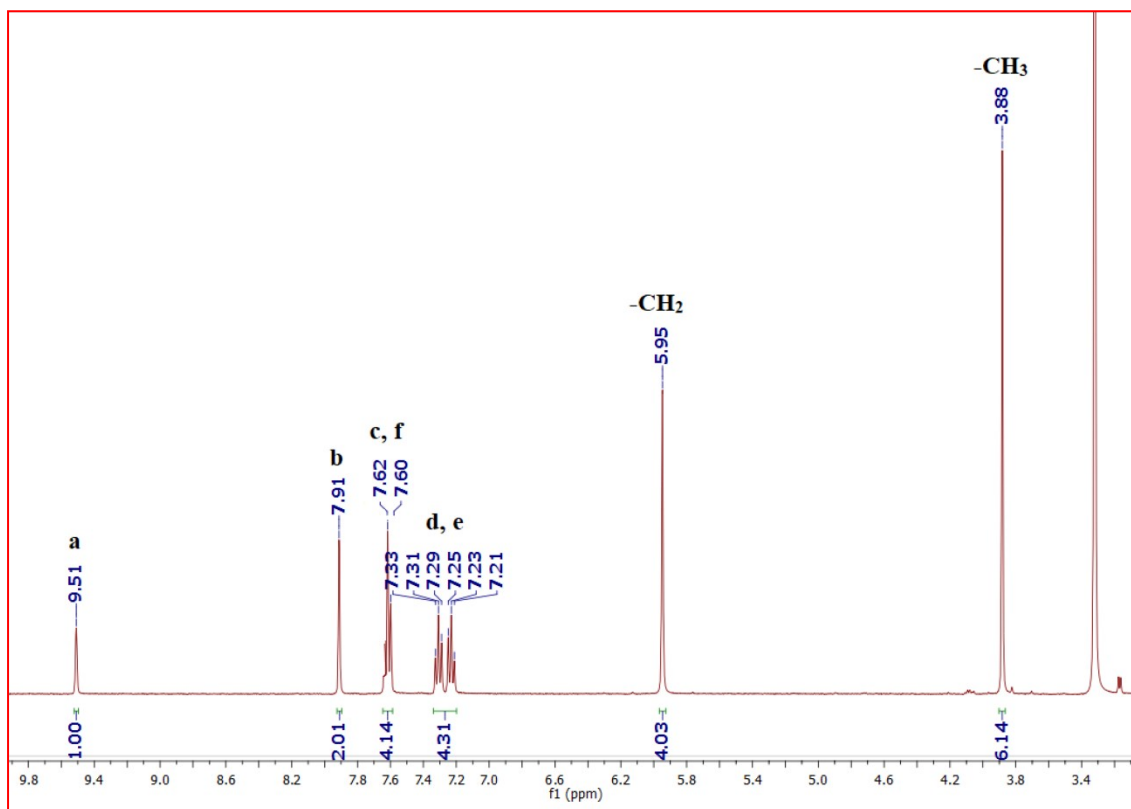

Figure S1:  $^1\text{H}$ NMR spectra of 1.HPF<sub>6</sub>.

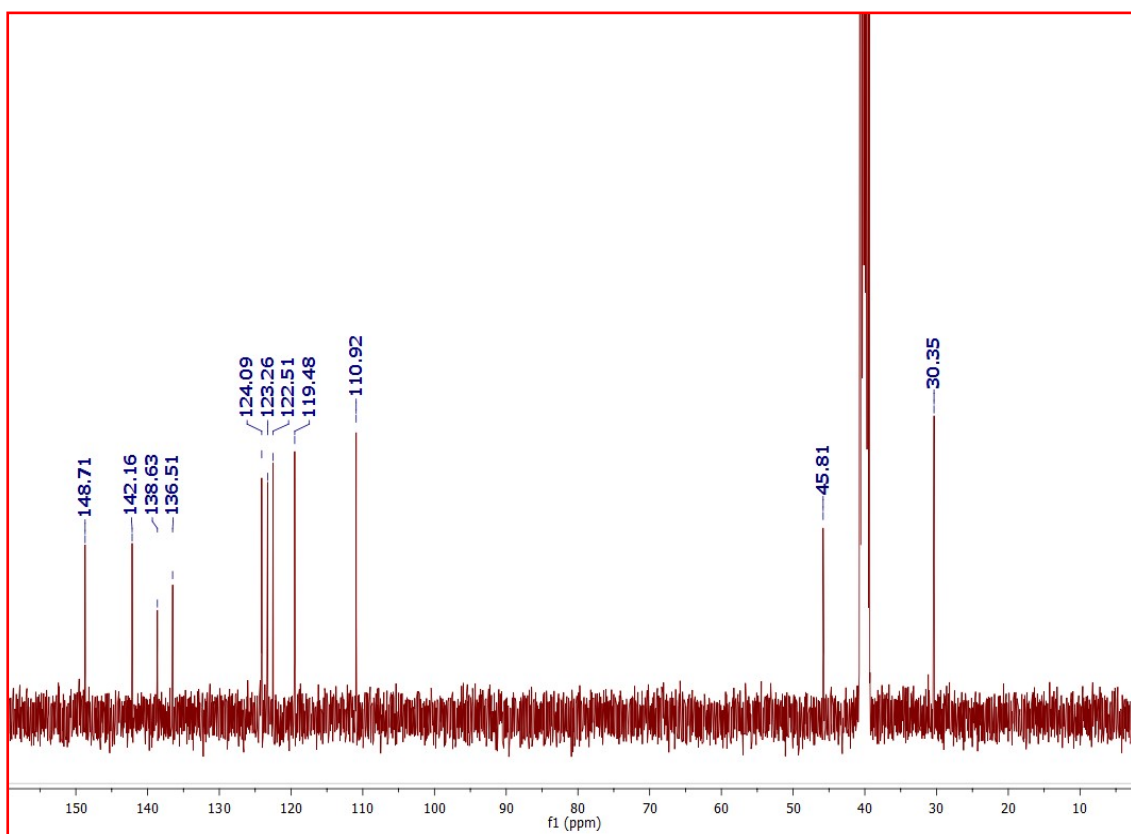

Figure S2:  $^{13}\text{C}$ NMR spectra of 1.HPF<sub>6</sub>.

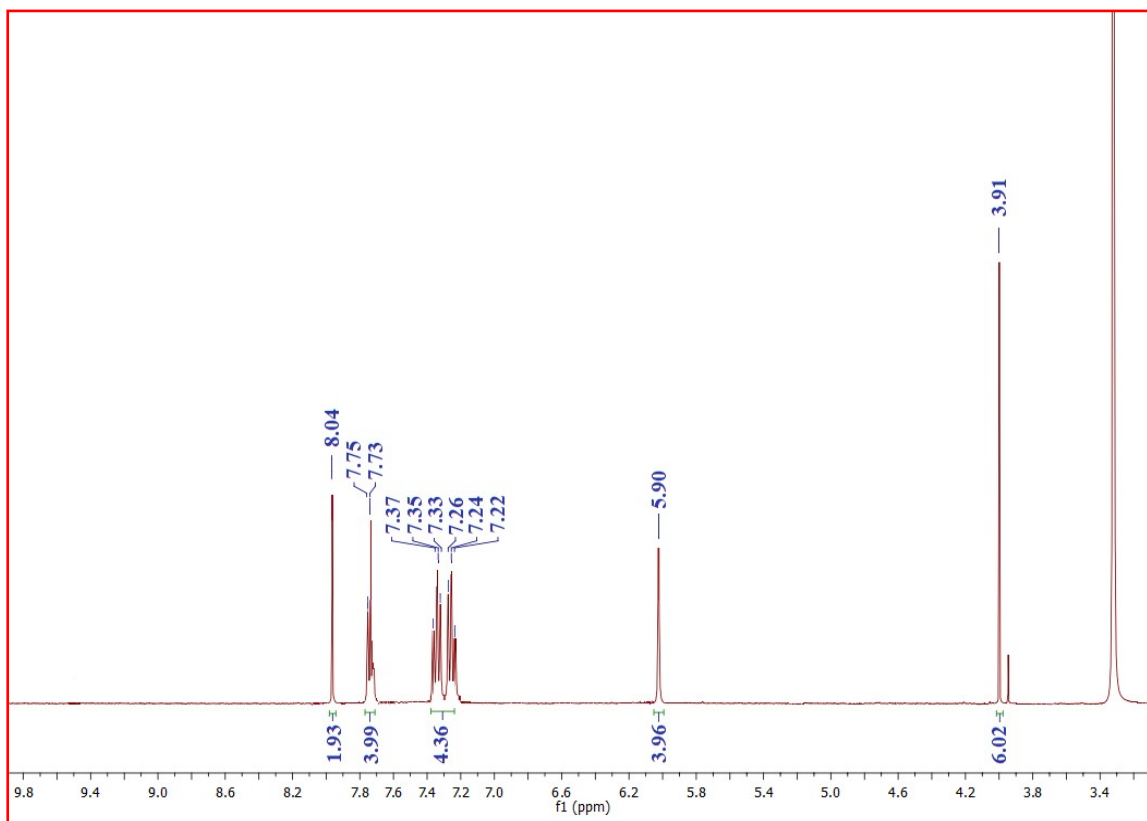

**Figure S3:**  $^1\text{H}$  NMR spectra of complex 2.

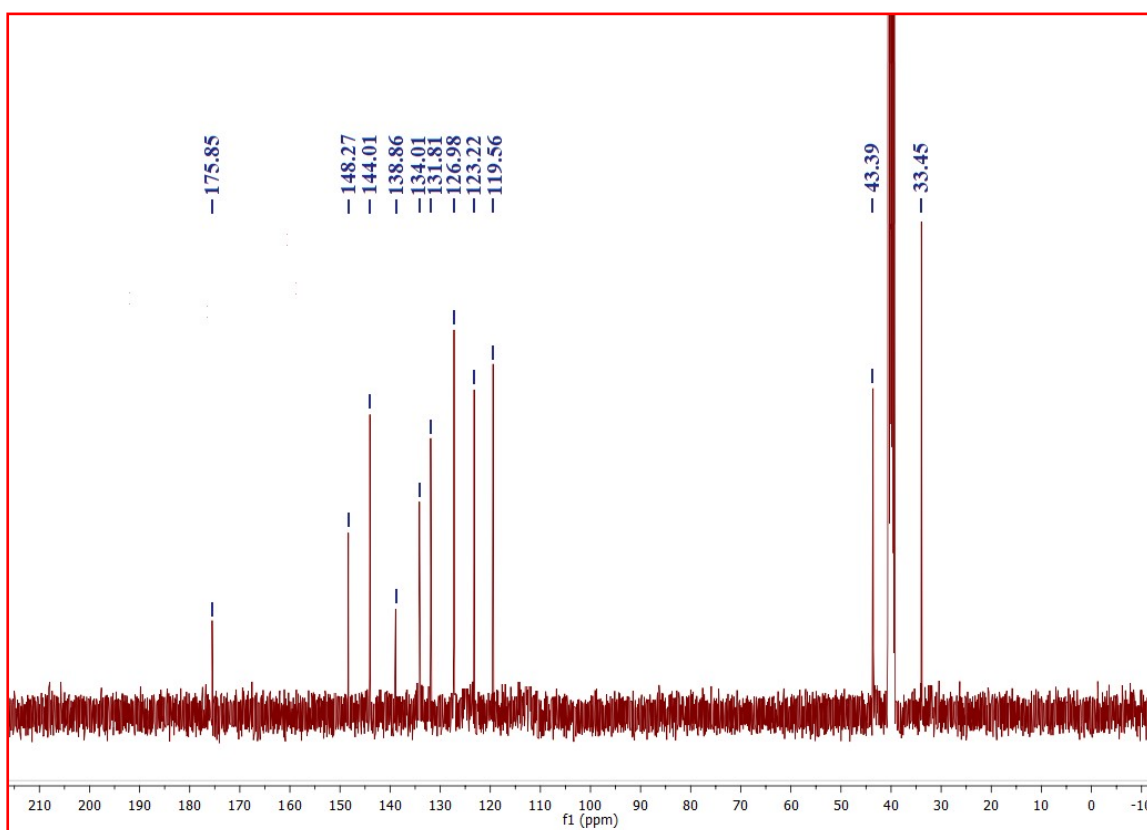

**Figure S4:**  $^{13}\text{C}$  NMR spectra of complex 2.

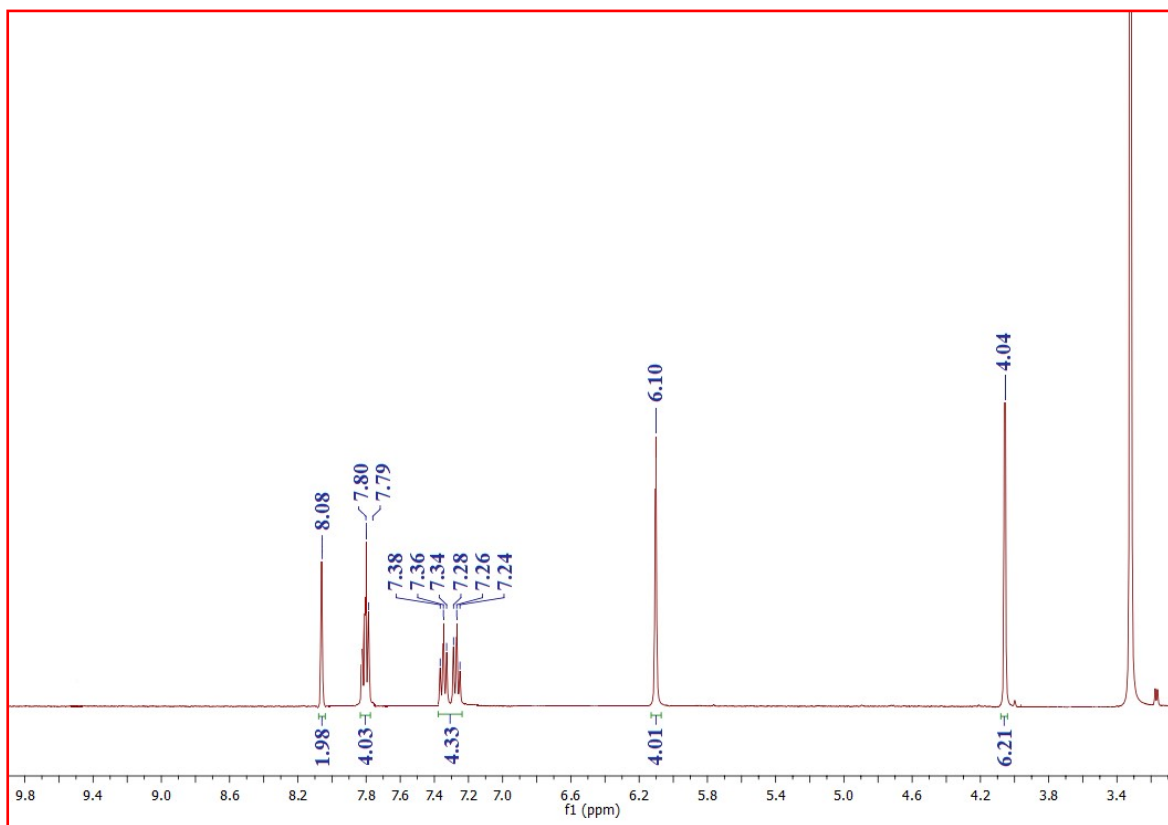

Figure S5:  $^1\text{H}$  NMR spectra of complex 3.

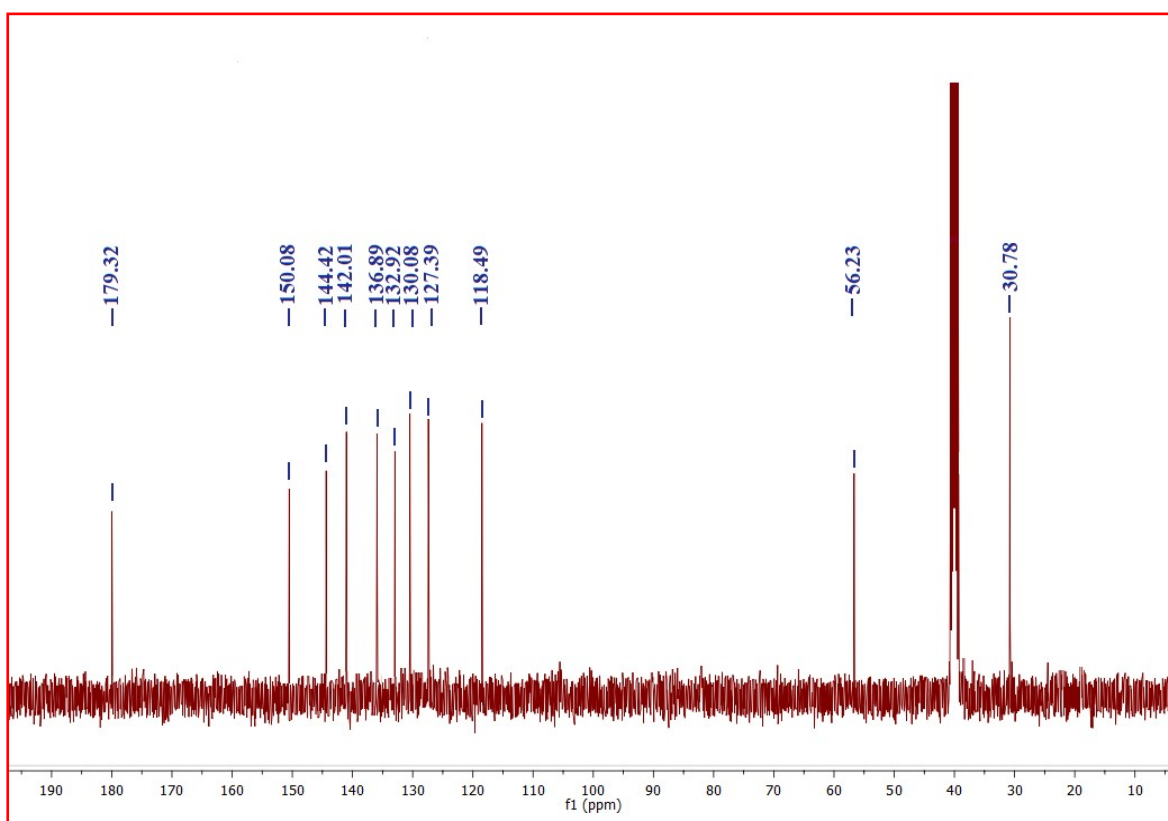

Figure S6:  $^{13}\text{C}$  NMR spectra of complex 3.

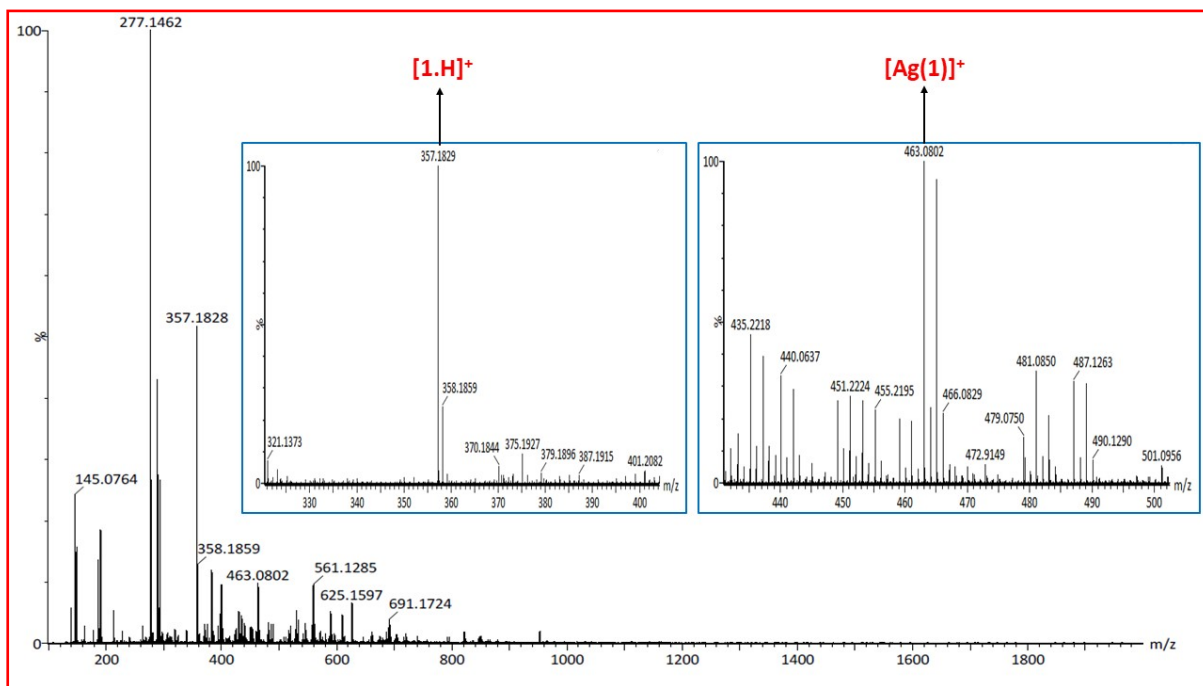

Figure S7:HR-MS spectra of complex 2.

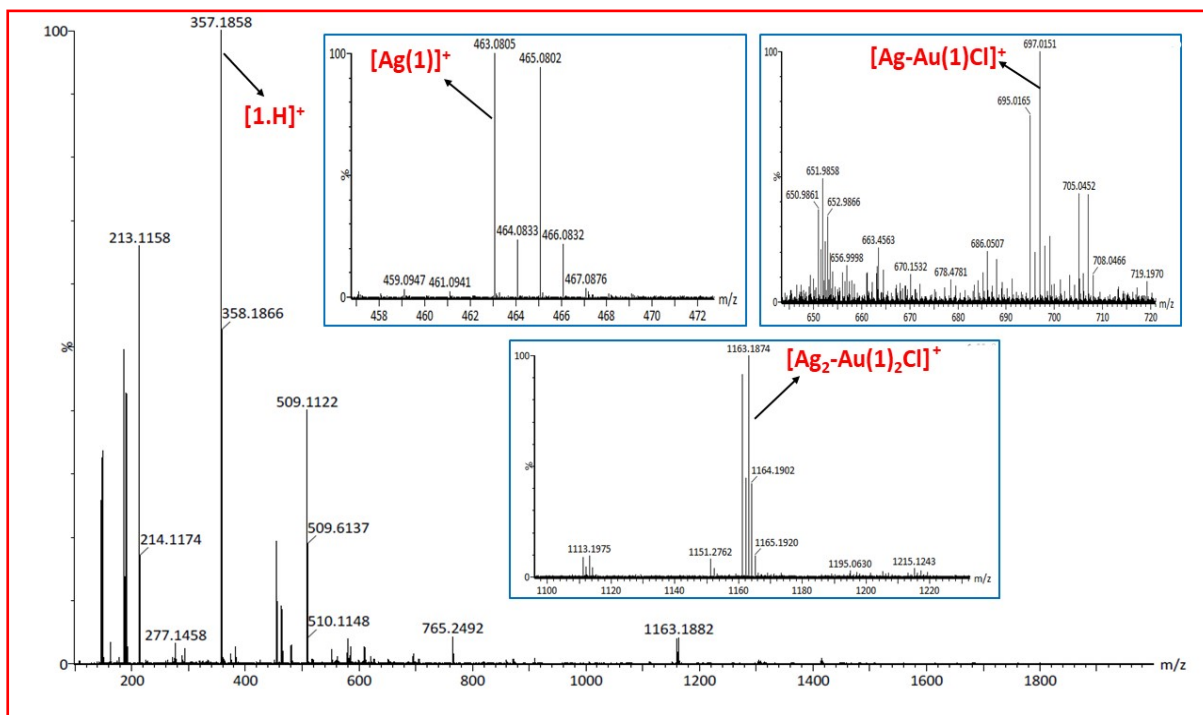

Figure S8:HR-MS spectra of complex 3.

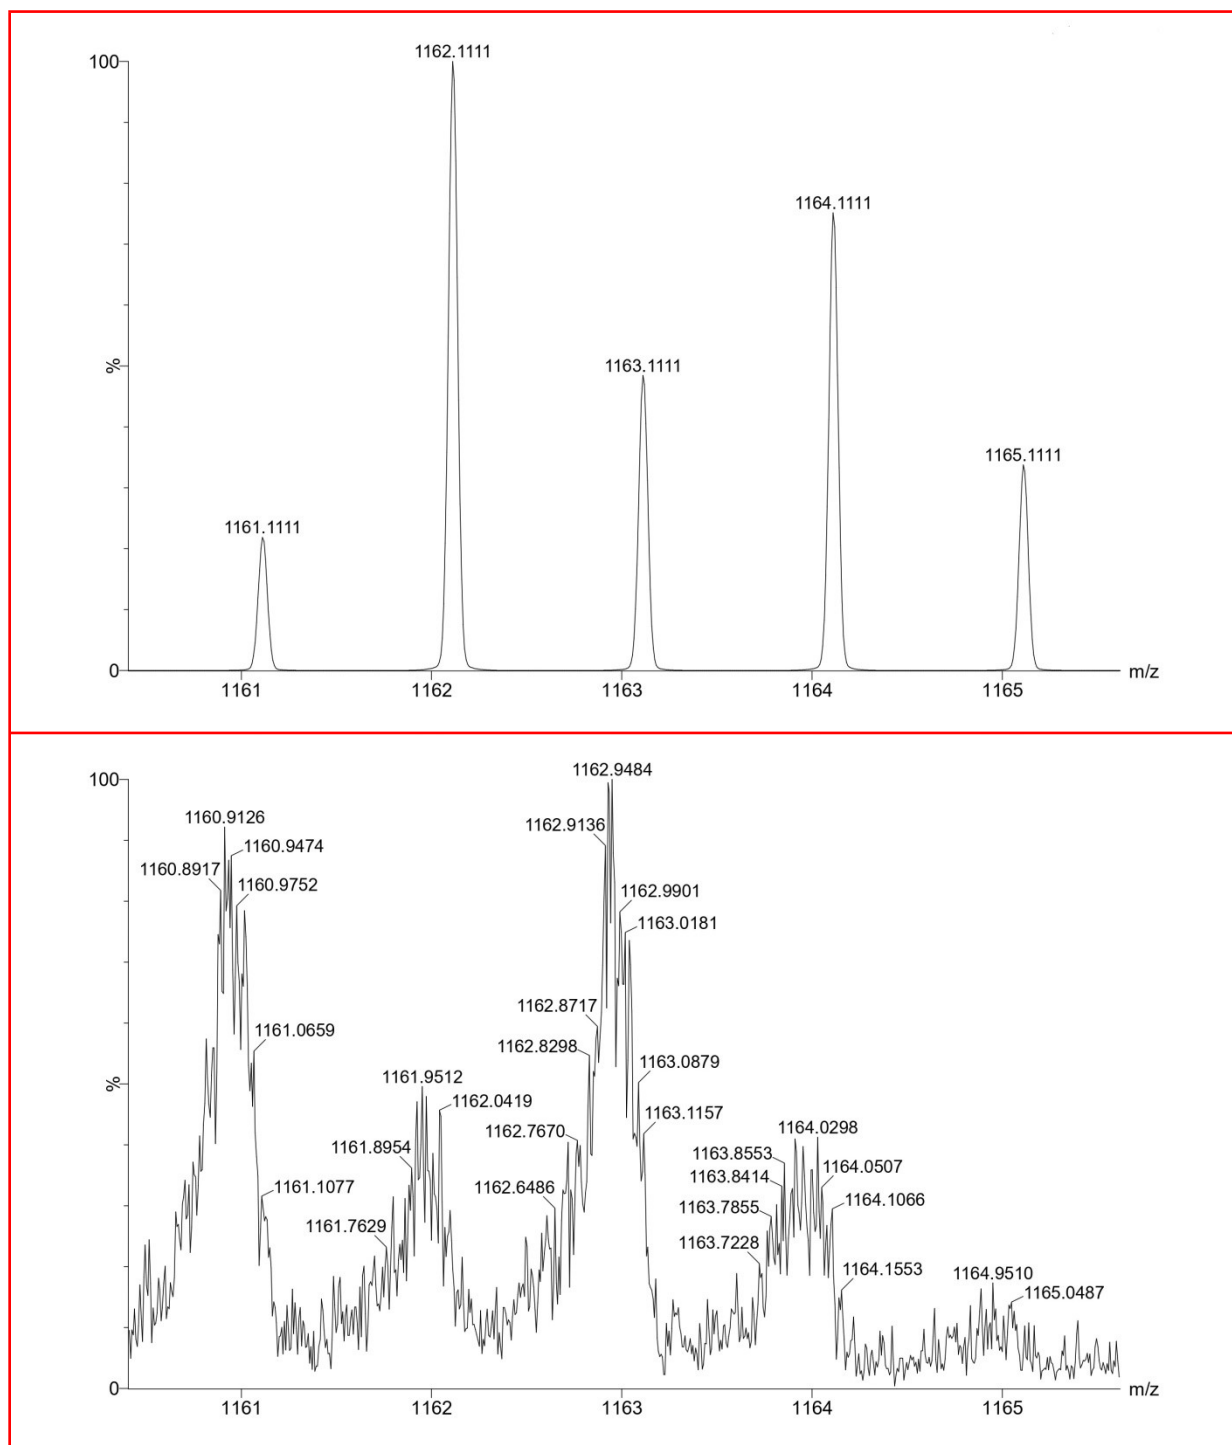

**Figure S9:** Mass spectrometry: experimental data (top) and isotopic pattern simulations (bottom) of complex **3**.

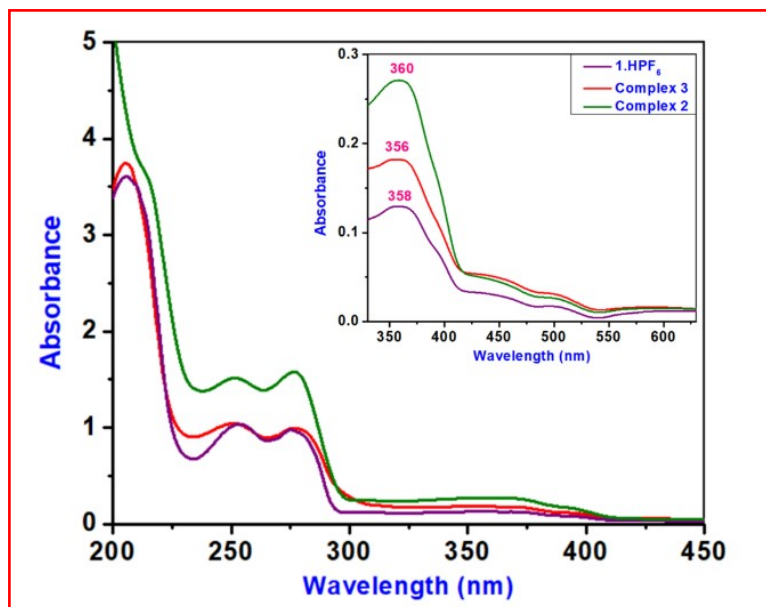

**Figure S10:** UV-Vis spectra of 1.HPF<sub>6</sub>, complex 2, and complex 3 at 0.05 mM conc. at room temperature.

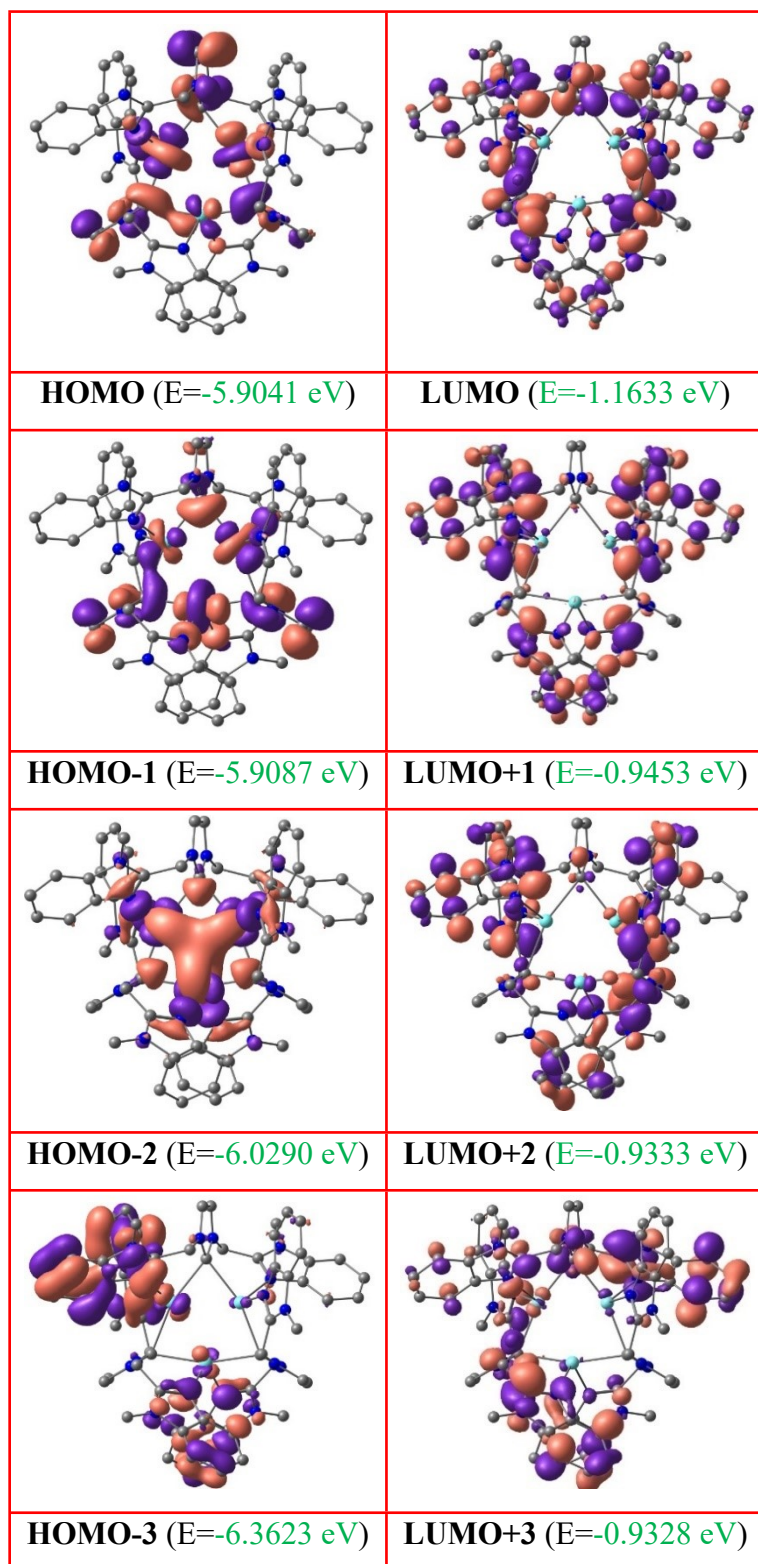

**Figure S11.** Molecular orbitals obtained for **2** at TD-DFT  $\text{SMD}_{(\text{acetonitrile})} / \text{B3LYP-D3/def2-TZVP (Ag), 6-31G}^{**}$  (C, H, N) level of theory.

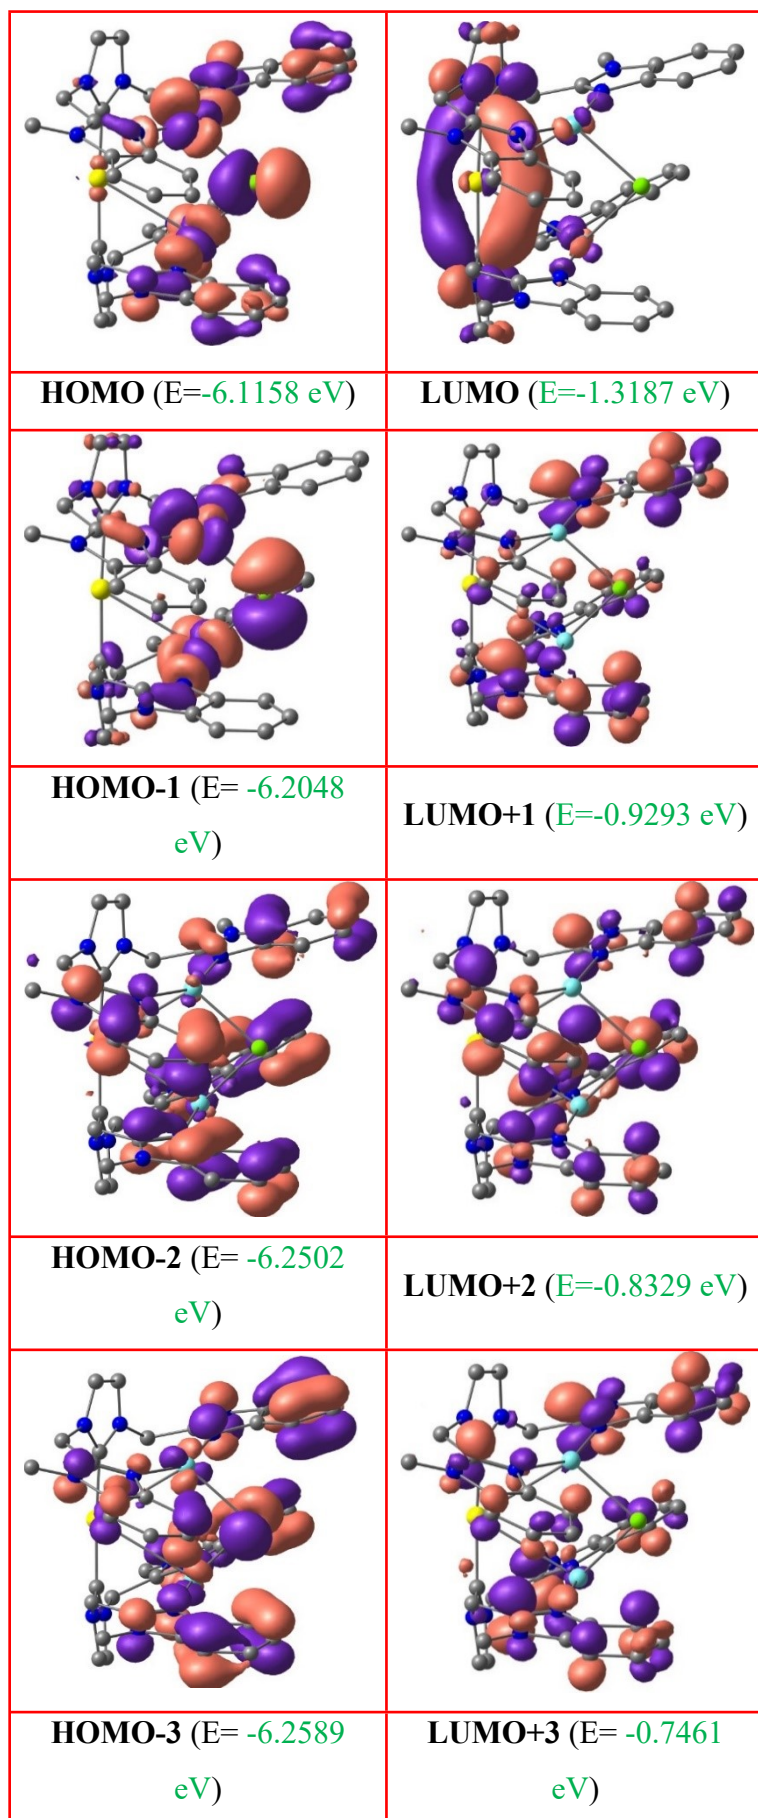

**Figure S12.** Molecular orbitals obtained for **3at** TD-DFT  $\text{SMD}_{(\text{acetonitrile})} / \text{B3LYP-D3/def2-TZVP}$  (Ag, Au), 6-31G\*\* (C, H, N, Cl) level of theory.



## References:

1. S. Grimme, J. Antony, S. Ehrlich and H. Krieg, *J. Chem. Phys.*, 2010, **132**, 154104–154119.
2. F. Weigend and R. Ahlrichs, *Phys. Chem. Chem. Phys.*, 2005, **7**, 3297–3305.
3. V. A. Rassolov, J. A. Pople, M. A. Ratner and T. Windus, *J. Chem. Phys.*, 1998, **109**, 1223–1229.
